# Supplementary material
Source: Research Square preprint supplement (doi:10.21203/rs.3.rs-8991890/v1)
Supplement: Supplementary file 1 [file e63ccca187c3a9f851e73e28.pdf]

## Highlights

- Rice waste was converted to biochar at different temperatures for wastewater remediation
- Rice straw derived biochar showed a higher adsorption capacity compared to rice husk biochar
- High retention capacity of heavy metals indicated the order  $Fe > Pb > Cu > Cd > Zn > Cr$
- Removal efficiencies of 78, 75 and 99% were achieved for 17- $\beta$  estradiol, estrone, and progesterone, respectively.
